# Supplementary material for: Anion complexation properties of 2,2′-bisamidodipyrrolylmethanes
Source: Royal Society of Chemistry journal article supplement (doi:10.1039/b303532h), 2003-01-01
Supplement: b303532h.doc [file b303532h.doc]

Anion complexation properties of 2,2’-bisamidodipyrrolylmethanes

Ismael El Drubi Vega, Salvatore Camiolo, Philip A. Gale,* Michael B. Hursthouse and Mark E. Light

School of Chemistry, University of Southampton, Southampton, SO17 1BJ, UK. Fax: +44 23 80596805; Tel: +44 23 80593332; E-mail: philip.gale@soton.ac.uk

SUPPLEMENTARY INFORMATION


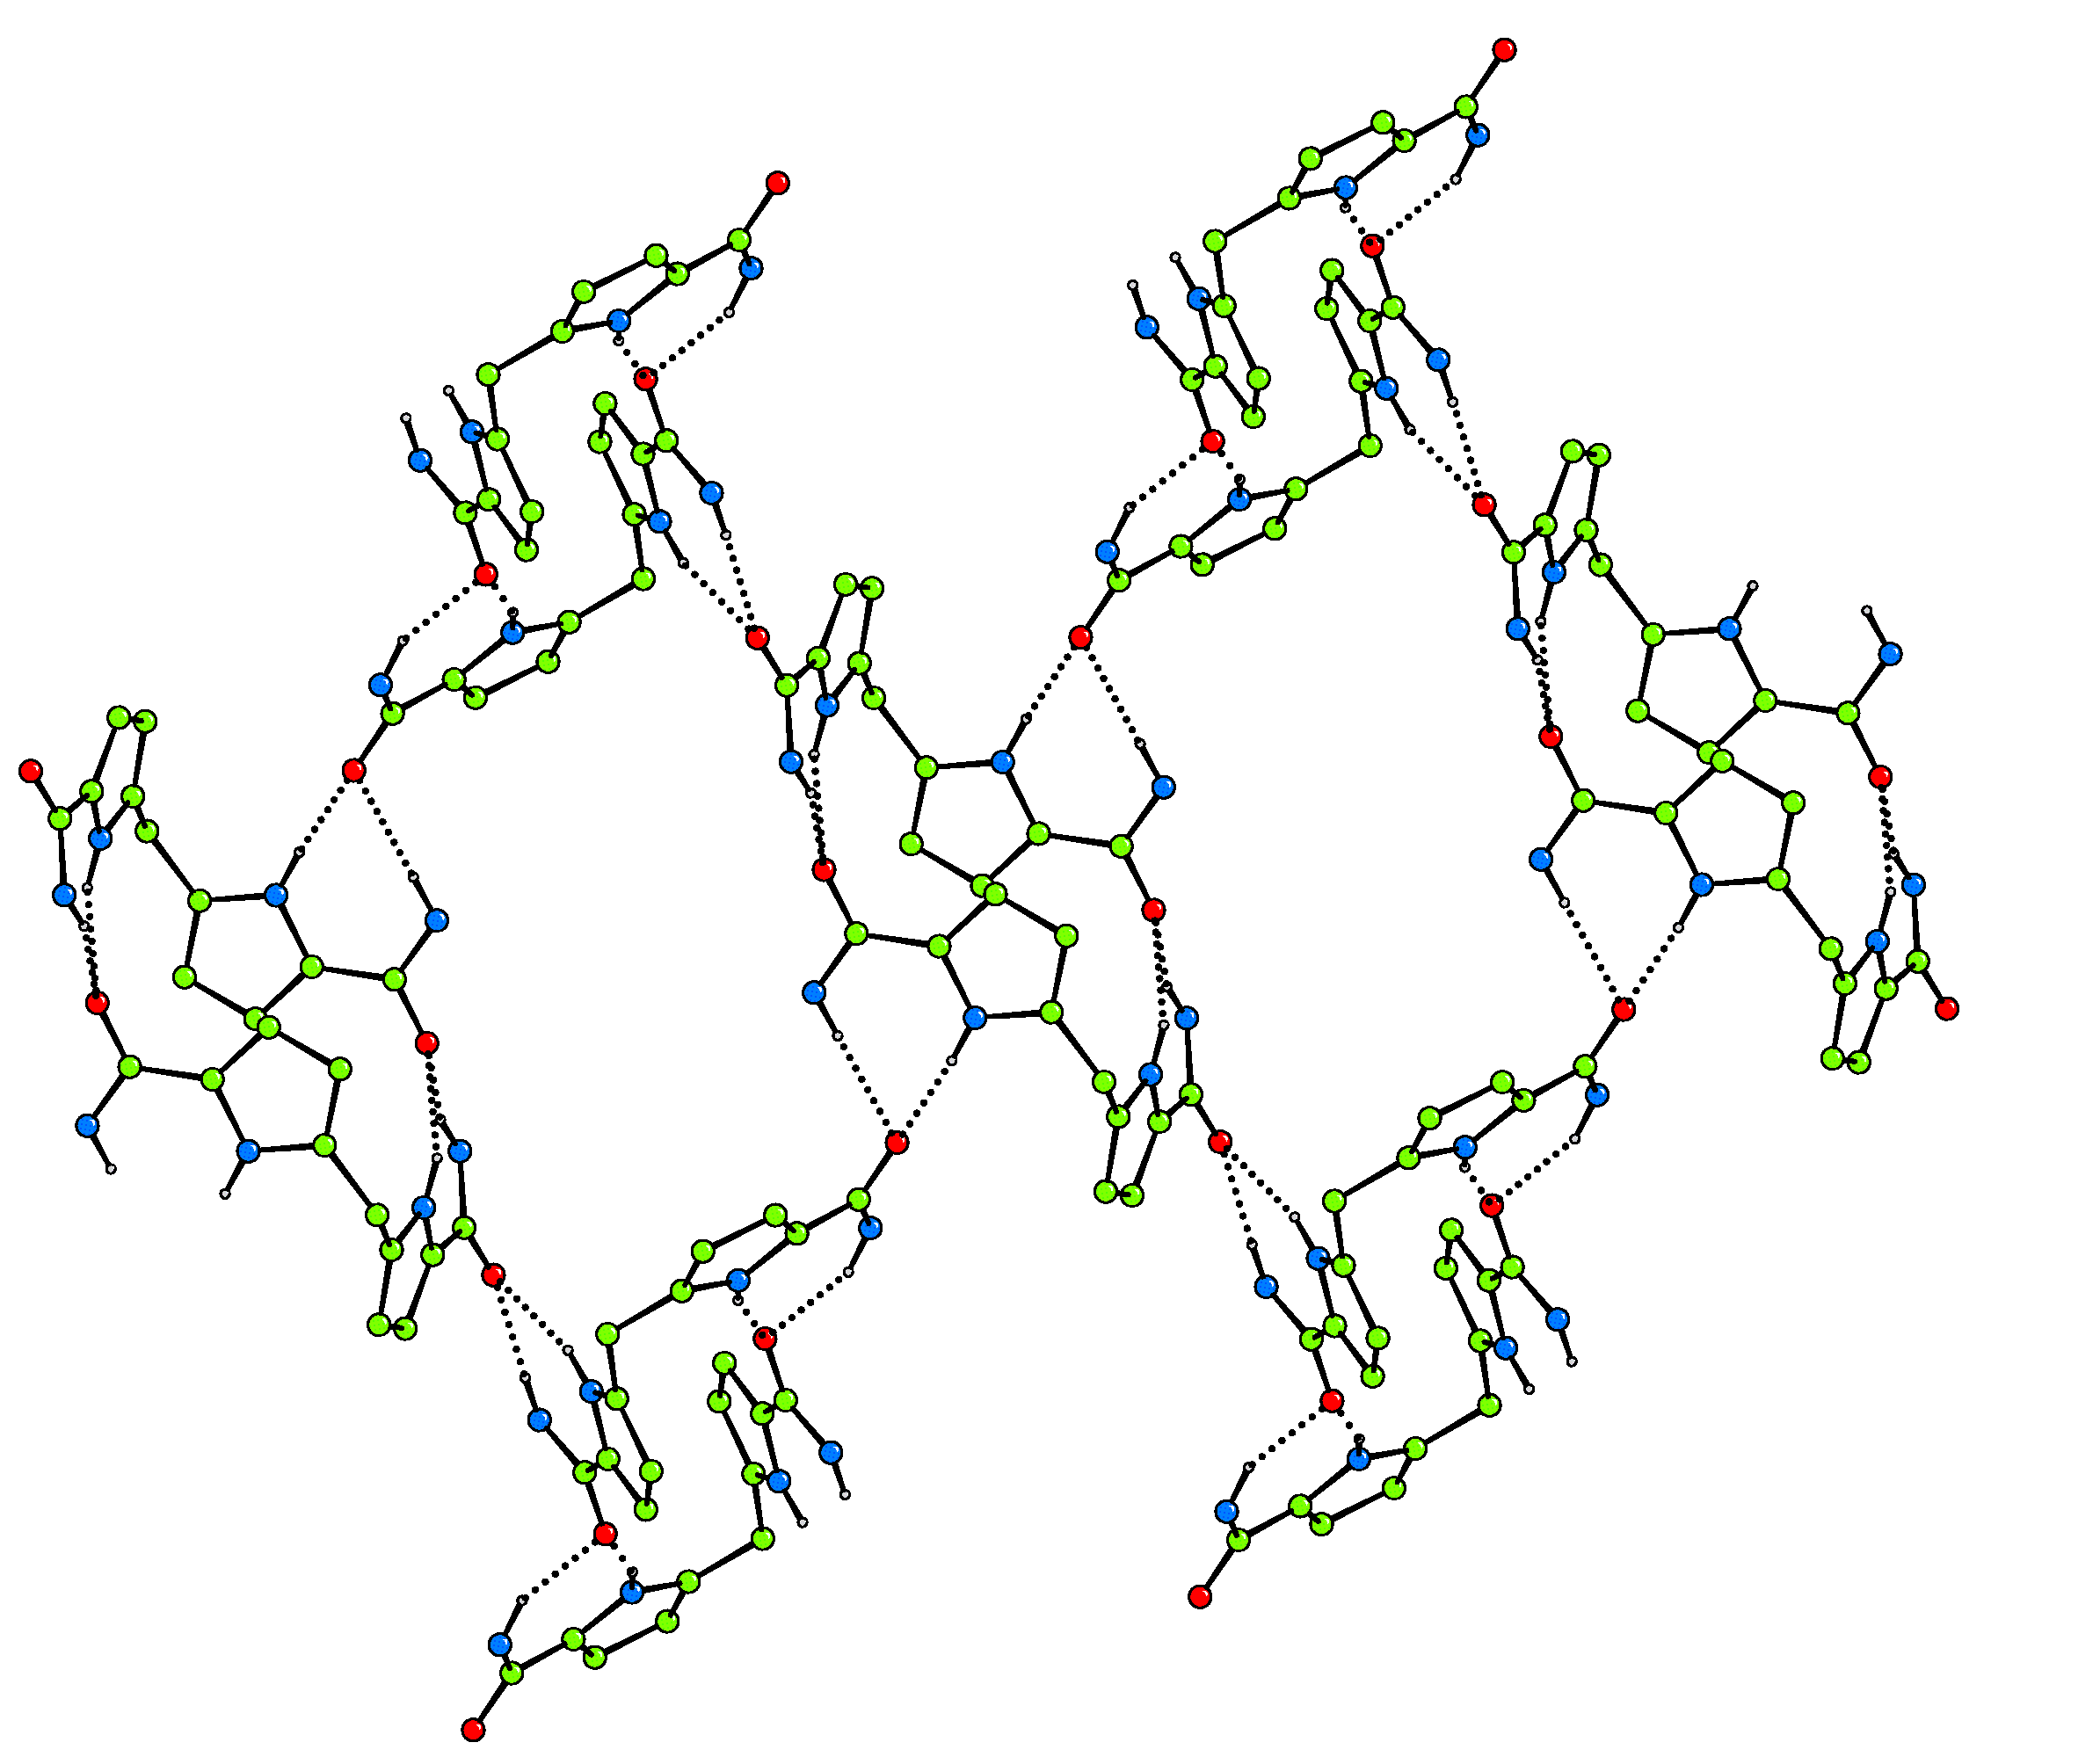


Figure S1 Hydrogen bonded sheets formed in the solid state by compound **1**. Side chain ethyl, methyl and butyl groups and non-acidic hydrogen atoms have been omitted for clarity.

Figure S2 1H NMR spectrum of compound **1** in DMSO-d6

Figure S3 13C NMR spectrum of compound **1** in DMSO-d6

Figure S4 ES+ MS spectrum of compound **1**

Figure S5 1H NMR spectrum of compound **2** in DMSO-d6

Figure S6 13C NMR Spectrum of **2** in DMSO-d6

Figure S7 ES+ MS of compound **2**.

Figure S8 1H NMR titration of compound **1** with fluoride in DMSO-*d6*/5% water.

Figure S9 1H NMR titration of compound **1** with chloride in DMSO-*d6*/5% water.

Figure S10 1H NMR titration of compound **1** with bromide in DMSO-*d6*/5% water.

Figure S11 1H NMR titration of compound **1** with benzoate in DMSO-*d6*/5% water.

Figure S12 1H NMR titration of compound **1** with dihydrogen phosphate in DMSO-*d6*/25% water.

Figure S13 1H NMR titration of compound **2** with fluoride in DMSO-*d6*/5% water.

Figure S14 1H NMR titration of compound **2** with chloride in DMSO-*d6*/5% water.

Figure S15 1H NMR titration of compound **2** with bromide in DMSO-*d6*/5% water.

Figure S16 1H NMR titration of compound **2** with benzoate in DMSO-*d6*/5% water.

Figure S17 1H NMR titration of compound **2** with dihydrogen phosphate in DMSO-*d6*/25% water.


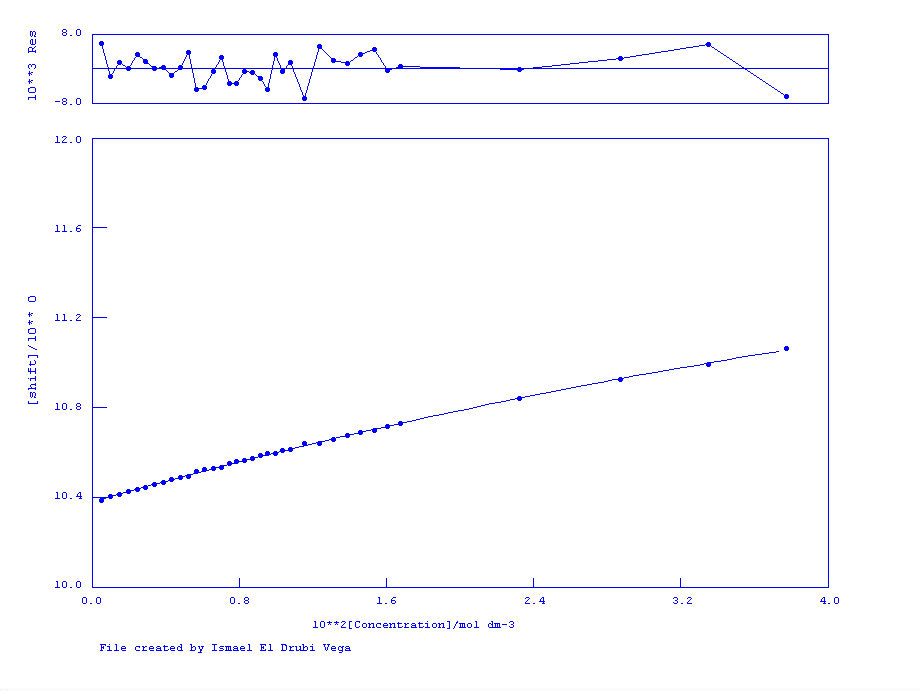


Figure S18 1H NMR titration of compound **1** with fluoride in DMSO-*d6*/25% water.


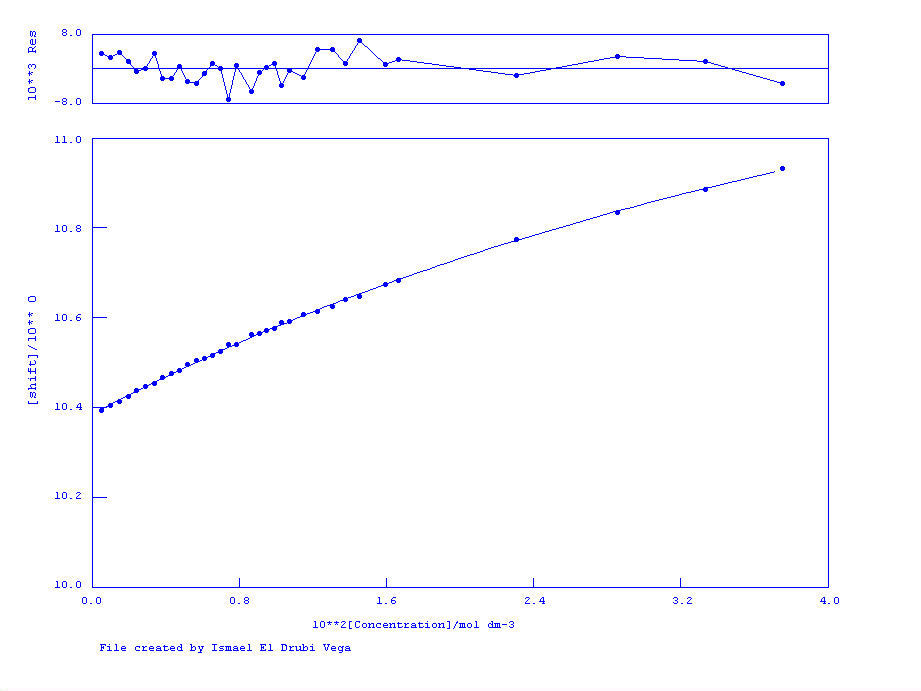


Figure S19 1H NMR titration of compound **2** with fluoride in DMSO-*d6*/25% water.
